# Supplementary material for: Plasmon-induced ultrafast charge transfer in single-particulate Cu1.94S–ZnS nanoheterostructures
Source: Royal Society of Chemistry journal article supplement (doi:10.1039/d1na00037c), 2021-01-01
Supplement: d1na00037c1.pdf [file d1na00037c1.pdf]

*Supplementary Materials for*

**Plasmon-induced ultrafast charge transfer in single-particulate  
copper sulfide-zinc sulfide nanoheterostructures**

Xueyi Guo,<sup>ac</sup> Sheng Liu,<sup>ac</sup> Weijia Wang,<sup>\*bc</sup> Chongyao Li,<sup>ac</sup> Ying Yang,<sup>ac</sup> Qinghua Tian,<sup>ac</sup> and Yong Liu<sup>bc</sup>

*<sup>a</sup> School of Metallurgy and Environment, Central South University, Changsha 410083, China*

*<sup>b</sup> State Key Laboratory for Powder Metallurgy, Powder Metallurgy Research Institute, Central South University, Changsha 410083, China*

*<sup>c</sup> Research Institute of Resource Recycling, Central South University, Changsha 410083, China*

\* Corresponding author at:

State Key Laboratory for Powder Metallurgy, Powder Metallurgy Research Institute, Central South University, Changsha 410083, China. E-mail address: wangweijia@csu.edu.cn (Weijia Wang).

**This PDF file includes:**

- **Scheme S1**
- **Fig. S1 to S8**
- **Table S1 to S3**
- **References**

• **Supplementary Materials: Scheme S1.**

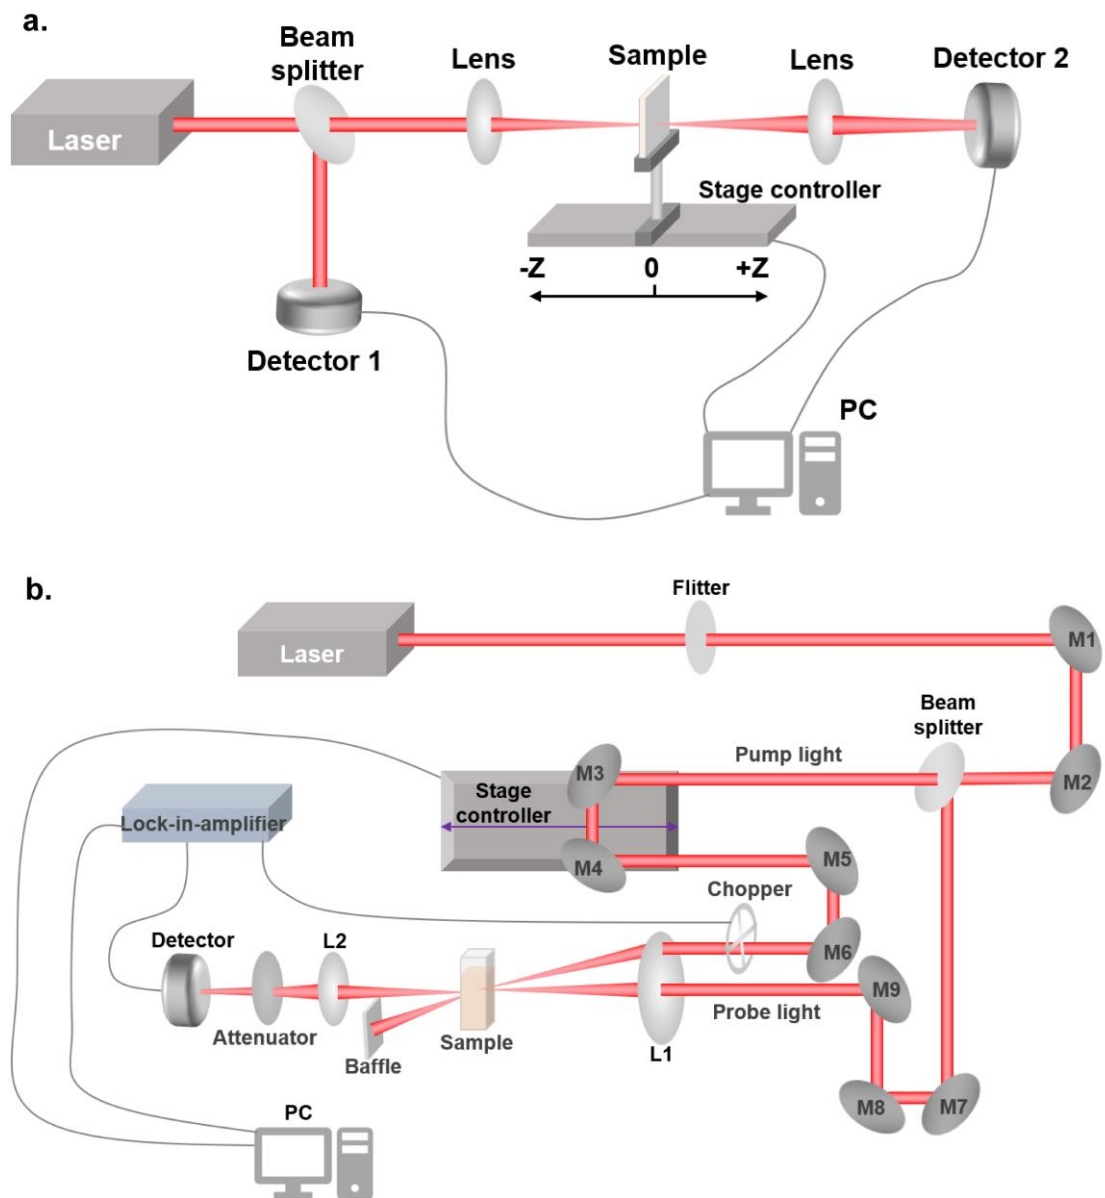

- **Supplementary Materials: Fig. S1.**

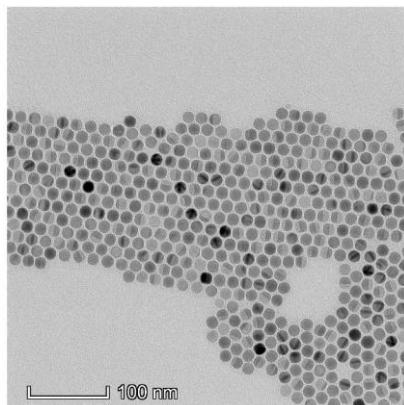

**Fig. S1** Low magnification TEM images of  $\text{Cu}_{1.94}\text{S}$ -ZnS NHs.

- **Supplementary Materials: Fig. S2.**

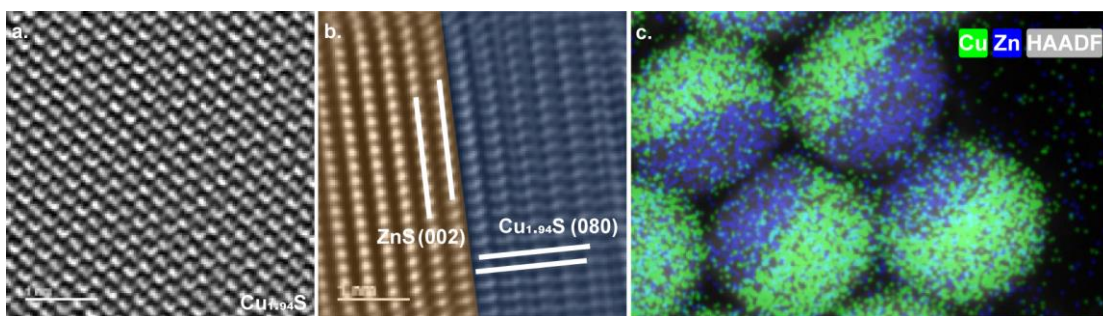

**Fig. S2** Local enlarged HRTEM images of  $\text{Cu}_{1.94}\text{S}$  NCs (a) and  $\text{Cu}_{1.94}\text{S}$ -ZnS NHs (b) after a fast Fourier transform (FFT) process using DigitalMicrograph software. (c) Merged image of EDS element maps and HAADF-STEM.

- **Supplementary Materials: Fig. S3**

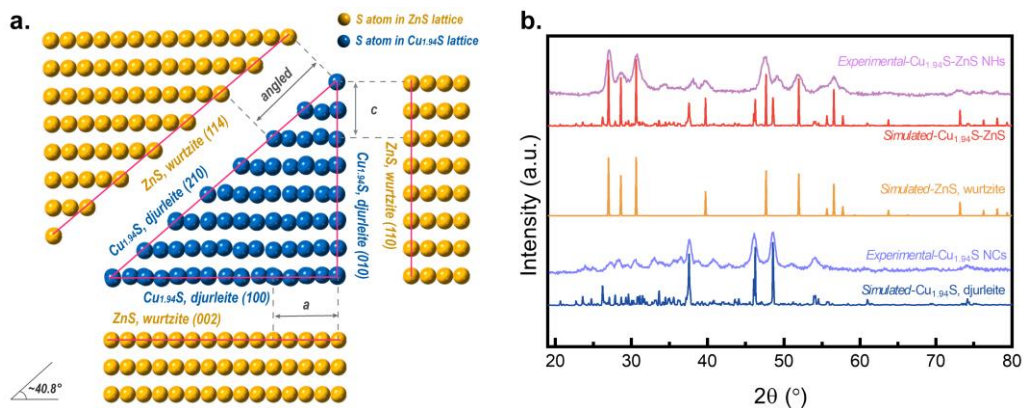

**Fig. S3** (a) Idealized projections of the crystal planes of sulfur sublattice in wurtzite ZnS and djurleite  $\text{Cu}_{1.94}\text{S}$ . (b) Simulated XRD patterns of djurleite  $\text{Cu}_{1.94}\text{S}$ , wurtzite ZnS, and merged  $\text{Cu}_{1.94}\text{S}$  (45%)-ZnS (55%). The crystallographic information files (CIFs) of standard djurleite  $\text{Cu}_{1.94}\text{S}$  and wurtzite ZnS were acquired from the American  
**Supplementary Materials: Page S3**

Mineralogist Crystal Structure Database. **Djurleite Cu<sub>1.94</sub>S**: Monoclinic, **a**=26.8970 Å, **b**=15.7450 Å, **c**=13.5650 Å, **β**=90.13°, P2<sub>1/n</sub>.<sup>1</sup> **Wurtzite ZnS**: Hexagonal, **a**=3.8110 Å, **c**=6.2340 Å, P6<sub>3mc</sub>.<sup>2</sup> The fractions of Cu<sub>1.94</sub>S and ZnS in the merged simulated XRD pattern were referenced from the XPS results of the real sample with appreciated adjustment. The crystallographic projections were generated using CrystalMaker<sup>®</sup> software, and the simulated and merged XRD patterns were generated using CrystalDiffract<sup>®</sup> software.

- **Supplementary Materials: Fig. S4.**

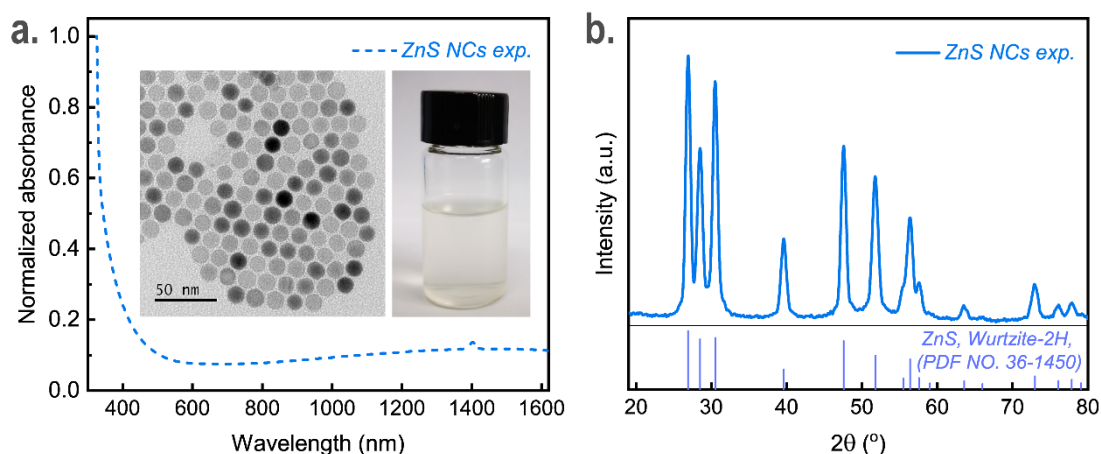

**Fig. S4** Key characterization of ZnS NCs. (a) UV-vis-NIR absorption spectra and (b) XRD result. Inset: TEM image and digital photograph of ZnS NCs dispersed in NMP.

- **Supplementary Materials: Fig. S5.**

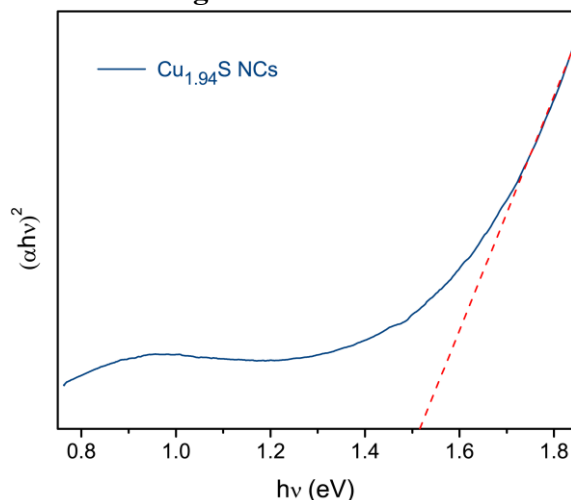

**Fig. S5**  $(\alpha h\nu)^2$ - $h\nu$  curve of the Cu<sub>1.94</sub>S NCs

- **Supplementary Materials: Fig. S6.**

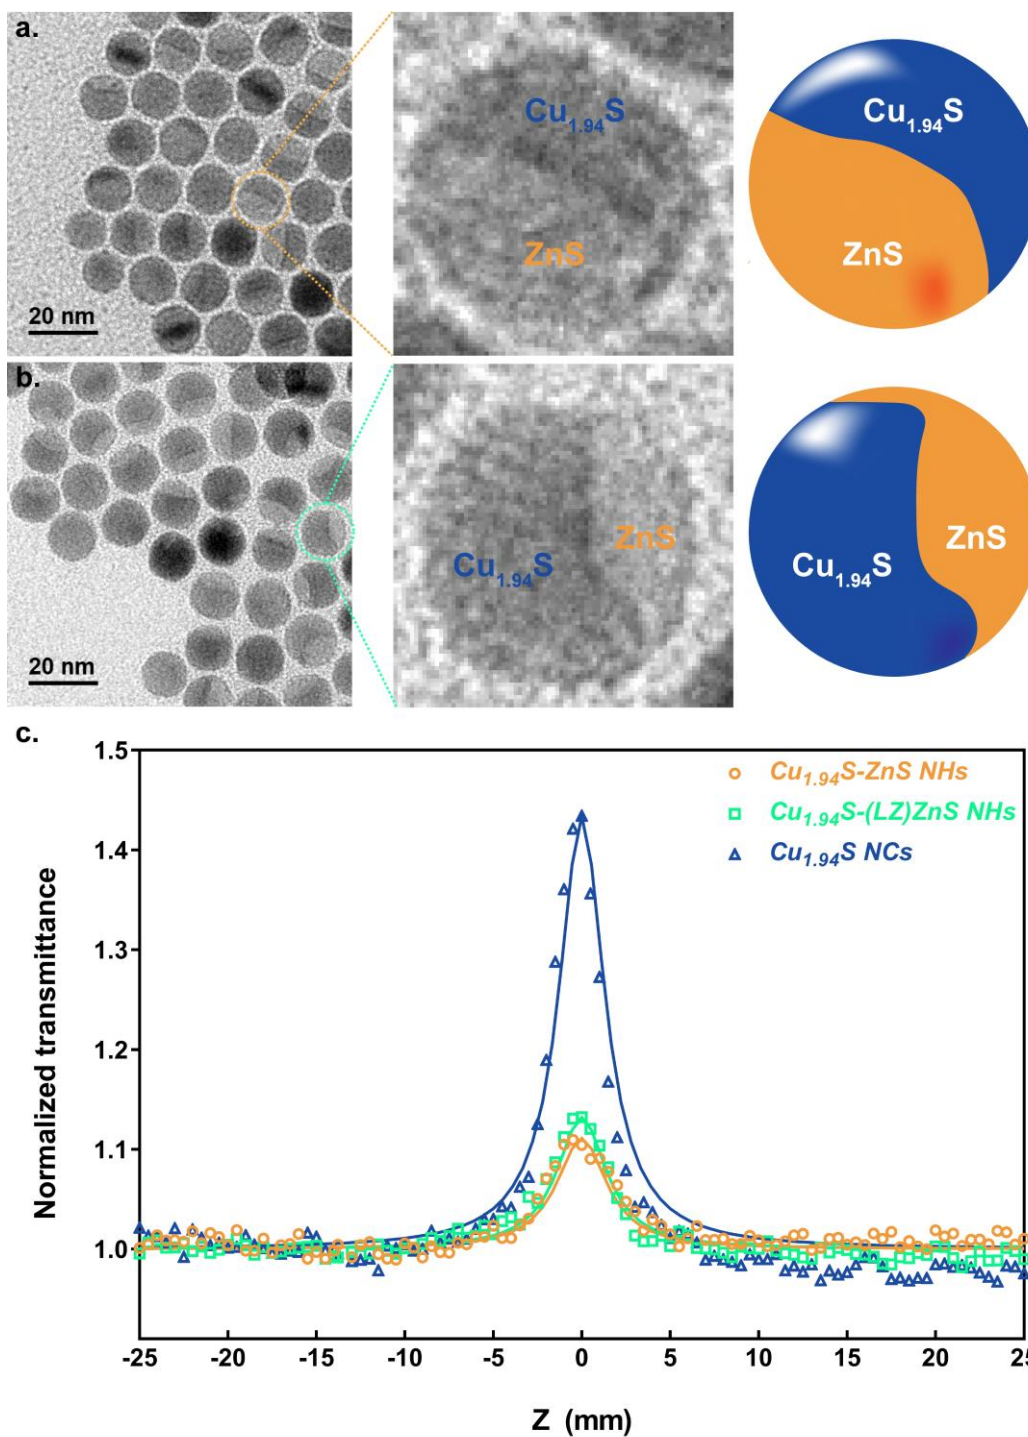

**Fig. S6** TEM images of  $\text{Cu}_{1.94}\text{S}$ -ZnS NHs (a) and  $\text{Cu}_{1.94}\text{S}$ -(LZ)ZnS NHs (b). (c) Open-aperture Z-scan results of different samples at 1500 nm with identical input intensity.

- **Supplementary Materials: Fig. S7.**

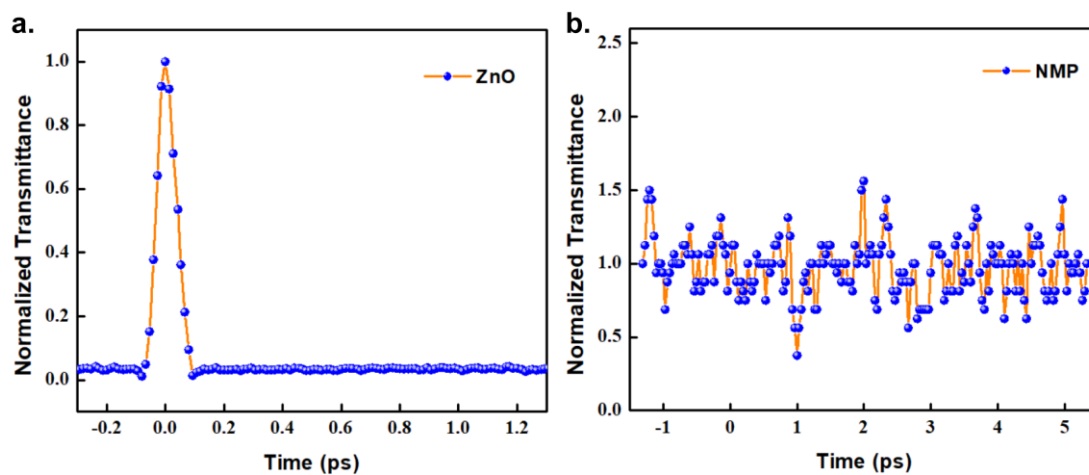

**Fig. S7** Pump-probe results for the standard sample (a) and solvent (b).

- **Supplementary Materials: Fig. S8.**

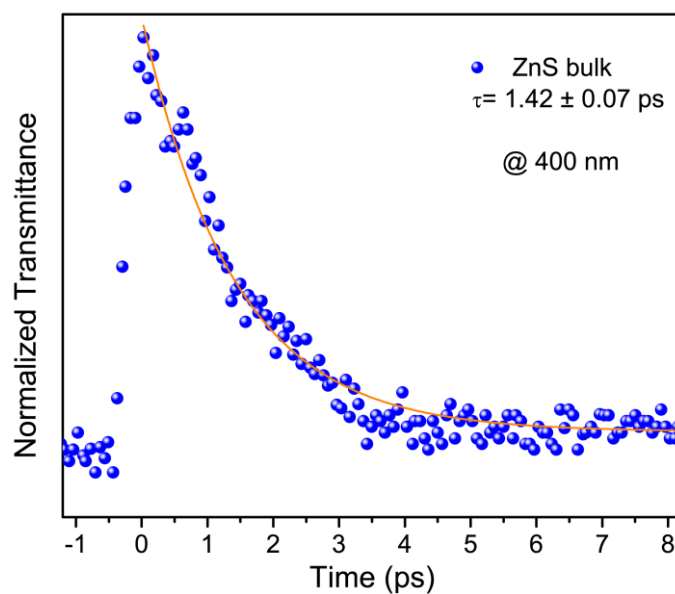

**Fig. S8** Pump-probe signals of bulk ZnS.

- **Supplementary Materials: Table S1.**

**Table S1.** Lattice parameters of djurleite  $\text{Cu}_{1.94}\text{S}$ , roxbyite  $\text{Cu}_{1.8}\text{S}$ , and digenite  $\text{Cu}_{1.8}\text{S}$

| Lattice parameters | $\text{Cu}_{1.94}\text{S}$ , <i>djurleite</i> <sup>1</sup> | $\text{Cu}_{1.8}\text{S}$ , <i>roxbyite</i> <sup>3</sup> | $\text{Cu}_{1.8}\text{S}$ , <i>digenite</i> <sup>4</sup> |
|--------------------|------------------------------------------------------------|----------------------------------------------------------|----------------------------------------------------------|
| $a$ (Å)            | 26.8970                                                    | 13.4090                                                  | 5.5820                                                   |
| $b$ (Å)            | 15.7450                                                    | 13.4051                                                  | 5.5820                                                   |
| $c$ (Å)            | 13.5650                                                    | 15.4852                                                  | 5.5820                                                   |
| $\alpha$ (°)       | 90.000                                                     | 90.022                                                   | 90.000                                                   |
| $\beta$ (°)        | 90.130                                                     | 90.021                                                   | 90.000                                                   |
| $\gamma$ (°)       | 90.000                                                     | 90.020                                                   | 90.000                                                   |
| Spacegroup         | $P 2_1/n$                                                  | P T                                                      | F m $\bar{3}m$                                           |

- **Supplementary Materials: Table S2.**

**Table S2.** The lattice parameters and mismatches in sulfur spacing for the djurleite  $\text{Cu}_{1.94}\text{S}$ -wurtzite ZnS system in possible interfacial directions

| Lattice parameters | $\text{Cu}_{1.94}\text{S}$ , <i>djurleite</i> | ZnS, <i>wurtzite</i> | Lattice mismatch, % |
|--------------------|-----------------------------------------------|----------------------|---------------------|
| $a$ (Å)            | 3.877                                         | 3.811                | ~1.70               |
| $c$ (Å)            | 6.716                                         | 6.234                | ~7.17               |
| Angled (Å)         | 10.193                                        | 9.847                | ~3.39               |
| $c/a$ ratio        | 1.732                                         | ~1.636               | /                   |

- **Supplementary Materials: Table S3.**

**Table S3.** Peak identifications of XPS from survey spectra \*

| <b>Samples</b>               | <b>BE (eV)</b> | <b>Elements</b> | <b>Attributions</b>      | <b>Spectral Lines</b>   |
|------------------------------|----------------|-----------------|--------------------------|-------------------------|
| Cu <sub>1.94</sub> S NCs     | 75.19          | Cu              | Cu <sub>1.94</sub> S     | <i>3p</i>               |
| Cu <sub>1.94</sub> S NCs     | 122.19         | Cu              | Cu <sub>1.94</sub> S     | <i>3s</i>               |
| Cu <sub>1.94</sub> S NCs     | 162.19         | S               | Cu <sub>1.94</sub> S     | <i>2p</i>               |
| Cu <sub>1.94</sub> S NCs     | 225.19         | S               | Cu <sub>1.94</sub> S     | <i>2s</i>               |
| Cu <sub>1.94</sub> S NCs     | 285.19         | C               | Organics                 | <i>1s</i>               |
| Cu <sub>1.94</sub> S NCs     | 549.19         | Cu              | Cu <sub>1.94</sub> S     | <i>Auger</i>            |
| Cu <sub>1.94</sub> S NCs     | 569.19         | Cu              | Cu <sub>1.94</sub> S     | <i>Auger</i>            |
| Cu <sub>1.94</sub> S NCs     | 648.19         | Cu              | Cu <sub>1.94</sub> S     | <i>Auger</i>            |
| Cu <sub>1.94</sub> S NCs     | 932.19         | Cu              | Cu <sub>1.94</sub> S     | <i>2p<sub>3/2</sub></i> |
| Cu <sub>1.94</sub> S NCs     | 951.19         | Cu              | Cu <sub>1.94</sub> S     | <i>2p<sub>1/2</sub></i> |
| Cu <sub>1.94</sub> S-ZnS NHs | 10.19          | Zn              | ZnS                      | <i>3d</i>               |
| Cu <sub>1.94</sub> S-ZnS NHs | 75.19          | Cu              | Cu <sub>1.94</sub> S     | <i>3p</i>               |
| Cu <sub>1.94</sub> S-ZnS NHs | 89.19          | Zn              | ZnS                      | <i>3p</i>               |
| Cu <sub>1.94</sub> S-ZnS NHs | 122.19         | Cu              | Cu <sub>1.94</sub> S     | <i>3s</i>               |
| Cu <sub>1.94</sub> S-ZnS NHs | 139.19         | Zn              | ZnS                      | <i>3s</i>               |
| Cu <sub>1.94</sub> S-ZnS NHs | 162.19         | S               | Cu <sub>1.94</sub> S/ZnS | <i>2p</i>               |
| Cu <sub>1.94</sub> S-ZnS NHs | 226.19         | S               | Cu <sub>1.94</sub> S/ZnS | <i>2s</i>               |
| Cu <sub>1.94</sub> S-ZnS NHs | 285.19         | C               | Organics                 | <i>1s</i>               |
| Cu <sub>1.94</sub> S-ZnS NHs | 472.19         | Zn              | ZnS                      | <i>Auger</i>            |
| Cu <sub>1.94</sub> S-ZnS NHs | 495.19         | Zn              | ZnS                      | <i>Auger</i>            |
| Cu <sub>1.94</sub> S-ZnS NHs | 531.19         | O               | Environment              | <i>1s</i>               |
| Cu <sub>1.94</sub> S-ZnS NHs | 570.19         | Cu              | Cu <sub>1.94</sub> S     | <i>Auger</i>            |
| Cu <sub>1.94</sub> S-ZnS NHs | 932.19         | Cu              | Cu <sub>1.94</sub> S     | <i>2p<sub>3/2</sub></i> |
| Cu <sub>1.94</sub> S-ZnS NHs | 951.19         | Cu              | Cu <sub>1.94</sub> S     | <i>2p<sub>1/2</sub></i> |
| Cu <sub>1.94</sub> S-ZnS NHs | 1021.19        | Zn              | ZnS                      | <i>2p<sub>3/2</sub></i> |
| Cu <sub>1.94</sub> S-ZnS NHs | 1044.19        | Zn              | ZnS                      | <i>2p<sub>1/2</sub></i> |

\* The BE peaks in survey spectra are directly read from the original data and may be slightly different from the corresponding BE peaks in high-resolution spectra. This is caused by the scanning accuracy induced deviation. The scanning increment for survey spectra was 1.0 eV/point, and the increment for high-resolution spectra was 0.05 eV/point.



## References

- (1) Evans, H. T. The crystal structures of low chalcocite and djurleite. *Zeitschrift für Kristallographie* **1979**, *150*, 299-320.
- (2) Wyckoff, R. W. G. Wurtzite structure. *Crystal Structures*, Second edition **1963**, *1*, 85-237.
- (3) Mumme, W. G.; Gable, R. W.; Petricek, V. The crystal structure of roxbyite,  $\text{Cu}_{58}\text{S}_{32}$ . *The Canadian Mineralogist* **2012**, *50*, 423-430.
- (4) Yamamoto, K.; Kashida, S. X-ray study of the average structures of  $\text{Cu}_2\text{Se}$  and  $\text{Cu}_{1.8}\text{S}$  in the room temperature and the high temperature phases. *Journal of Solid State Chemistry* **1991**, *93*, 202-211.
